# Supplementary material
Source: ML conference proceedings conference paper supplement (https://proceedings.neurips.cc/paper_files/paper/2013/hash/7f100b7b36092fb9b06dfb4fac360931-Abstract.html)
Supplement: Supplementary file [file 7f100b7b36092fb9b06dfb4fac360931-Supplemental.zip]

# 1 Supplementary Material

## 1.1 Derivation of equation (2)

The multi-information is defined as

$$I[\mathbf{Y} : \mathbf{U} : \mathbf{V}] = \left\langle \log \frac{p(\mathbf{y}, \mathbf{u}, \mathbf{v})}{p(\mathbf{y})p(\mathbf{u})p(\mathbf{v})} \right\rangle_{\mathbf{Y}, \mathbf{U}, \mathbf{V}}.$$

It satisfies the chain rule

$$I[\mathbf{Y} : \mathbf{U} : \mathbf{V}] = I[(\mathbf{Y}, \mathbf{U}) : \mathbf{V}] + I[\mathbf{Y} : \mathbf{U}].$$

Therefore,

$$\begin{aligned} I[\mathbf{Y} : \mathbf{U} : \mathbf{V}] &= I[(\mathbf{Y}, \mathbf{U}) : \mathbf{V}] + I[\mathbf{Y} : \mathbf{U}] \\ &= I[\mathbf{Y} : (\mathbf{U}, \mathbf{V})] + I[\mathbf{U} : \mathbf{V}] \\ \Leftrightarrow I[(\mathbf{Y}, \mathbf{U}) : \mathbf{V}] &= I[\mathbf{Y} : (\mathbf{U}, \mathbf{V})] + I[\mathbf{U} : \mathbf{V}] - I[\mathbf{Y} : \mathbf{U}] \\ &= I[\mathbf{Y} : \mathbf{X}] + I[\mathbf{U} : \mathbf{V}] - I[\mathbf{Y} : \mathbf{U}]. \end{aligned}$$

## 1.2 Kernels and their derivatives

**RBF kernel** The RBF kernel is given by

$$k(\mathbf{x}_i, \mathbf{x}_j) = \exp\left(-\frac{\|\mathbf{x}_i - \mathbf{x}_j\|^2}{\sigma^2}\right).$$

Its derivative w.r.t.  $\mathbf{x}_i$  is

$$\frac{\partial}{\partial \mathbf{x}_i} k(\mathbf{x}_i, \mathbf{x}_j) = k(\mathbf{x}_i, \mathbf{x}_j) \cdot -\frac{2}{\sigma^2} (\mathbf{x}_i - \mathbf{x}_j).$$

**RBF tensor kernel** The RBF tensor kernel is given by

$$\begin{aligned} k((\mathbf{x}_1, \mathbf{y}_1), (\mathbf{x}_2, \mathbf{y}_2)) &= \exp\left(-\frac{\|\mathbf{x}_1 \otimes \mathbf{y}_1 - \mathbf{x}_2 \otimes \mathbf{y}_2\|_2^2}{\sigma^2}\right) \\ \|\mathbf{x}_1 \otimes \mathbf{y}_1 - \mathbf{x}_2 \otimes \mathbf{y}_2\|_2^2 &= \langle \mathbf{x}_1 \otimes \mathbf{y}_1, \mathbf{x}_1 \otimes \mathbf{y}_1 \rangle - 2 \langle \mathbf{x}_1 \otimes \mathbf{y}_1, \mathbf{x}_2 \otimes \mathbf{y}_2 \rangle + \langle \mathbf{x}_2 \otimes \mathbf{y}_2, \mathbf{x}_2 \otimes \mathbf{y}_2 \rangle \\ &= \langle \mathbf{x}_1, \mathbf{x}_1 \rangle \langle \mathbf{y}_1, \mathbf{y}_1 \rangle - 2 \langle \mathbf{x}_1, \mathbf{x}_2 \rangle \langle \mathbf{y}_1, \mathbf{y}_2 \rangle + \langle \mathbf{x}_2, \mathbf{x}_2 \rangle \langle \mathbf{y}_2, \mathbf{y}_2 \rangle. \end{aligned}$$

The derivative of  $k$  w.r.t.  $\mathbf{x}_1$  and  $\mathbf{y}_2$  are given by

$$\begin{aligned} \frac{\partial}{\partial \mathbf{x}_1} k((\mathbf{x}_1, \mathbf{y}_1), (\mathbf{x}_2, \mathbf{y}_2)) &= k((\mathbf{x}_1, \mathbf{y}_1), (\mathbf{x}_2, \mathbf{y}_2)) \cdot -\frac{2}{\sigma^2} (\langle \mathbf{y}_1, \mathbf{y}_1 \rangle \mathbf{x}_1 - \langle \mathbf{y}_1, \mathbf{y}_2 \rangle \mathbf{x}_2) \\ \frac{\partial}{\partial \mathbf{y}_1} k((\mathbf{x}_1, \mathbf{y}_1), (\mathbf{x}_2, \mathbf{y}_2)) &= k((\mathbf{x}_1, \mathbf{y}_1), (\mathbf{x}_2, \mathbf{y}_2)) \cdot -\frac{2}{\sigma^2} (\langle \mathbf{x}_1, \mathbf{x}_1 \rangle \mathbf{y}_1 - \langle \mathbf{x}_1, \mathbf{x}_2 \rangle \mathbf{y}_2). \end{aligned}$$

## 1.3 Computation of $J$

**For the regular case** For HSIC, the matrix  $J$  can be computed in terms of the partial derivatives

$$\left(D_\eta^{(u)}\right)_{ij} = \left(\frac{\partial}{\partial u_{i\eta}} k((\mathbf{u}_i, \mathbf{v}_i, \mathbf{y}_i), (\mathbf{u}_j, \mathbf{v}_j, \mathbf{y}_j))\right)_{ij}$$

of the kernel with respect to the  $\eta^{th}$  dimension of  $\mathbf{u}$  (and analogously for  $\mathbf{v}$ ) in the *first* argument, even if  $i = j$ .

In general, consider any function  $f$  that depends on a kernel matrix  $K$  which in turn depends on set of data points  $\mathbf{u}_i$  collected in the rows of a matrix  $\Upsilon$ . Since  $K_{ij}$  only depends on the  $i^{th}$  and  $j^{th}$  example, the derivative  $\frac{\partial f}{\partial u_{i\eta}}$  can be written as

$$\frac{\partial f}{\partial u_{i\eta}} = \sum_{i,j=1}^m \left(\frac{df}{dK}\right)_{ij} \frac{dk_{ij}}{du_{i\eta}} (\delta_{i\eta} + \delta_{j\eta}) \quad \text{or} \quad \frac{\partial f}{\partial \Upsilon_{\cdot\eta}} = \text{diag}\left(\left(\frac{\partial f}{\partial K} + \frac{\partial f}{\partial K}^\top\right) D_\eta^{(u)\top}\right), \quad (1.1)$$

where  $\Upsilon_{\cdot\eta}$  denotes the  $\eta$ th column of  $\Upsilon$ . With  $f = \text{tr}$  and  $\frac{\partial}{\partial K_1} \text{tr}(K_1 H K_2 H) = H K_2 H$ , the derivatives in  $J = (J^{(u)}, J^{(v)})$  can be generically computed as a function of the derivatives of kernels  $D_\eta^{(u)}$  and  $D_\eta^{(v)}$ :

$$\begin{aligned} J_\eta^{(u)} &= \frac{2}{(m-1)^2} \text{diag} \left( H K_2 H D_\eta^{(u)\top} \right) \\ J_\eta^{(v)} &= \frac{2}{(m-1)^2} \text{diag} \left( H K_1 H D_\eta^{(v)\top} \right), \end{aligned}$$

since  $\text{tr}(K_1 H K_2 H) = \text{tr}(K_2 H K_1 H)$ .

**For the incomplete Cholesky decomposition** When computing the derivative of  $\hat{\gamma}_{hs}^2$  with the incomplete Cholesky decomposition, we need to take into account that (i) each entry in the kernel matrix might now be a function of more than a pair of data points, and we (ii) want to avoid having to compute the whole kernel matrix. In order to compute the derivative note that the approximation  $\tilde{K} = LL^\top$  to  $K$  is given by

$$K \approx \tilde{K} = LL^\top = \begin{pmatrix} K_{ii} & K_{ij} \\ K_{ii}^\top & K_{ij}^\top K_{ii}^{-1} K_{ij} \end{pmatrix},$$

where  $\mathbf{i}$  is an index set containing the indices of the pivot elements used to compute the incomplete Cholesky decomposition and  $\mathbf{j} = \{1, \dots, m\} \setminus \mathbf{i}$  is its complement [1]. Therefore,

$$\text{tr} \left( \underbrace{\tilde{K} H \tilde{K}_2 H}_{=: A^{(2)}} \right) = \text{tr} \left( K_{ii} A_{ii}^{(2)} \right) + \text{tr} \left( K_{ij} A_{jj}^{(2)} \right) + \text{tr} \left( K_{ji} A_{ij}^{(2)} \right) + \text{tr} \left( K_{ij}^\top K_{ii}^{-1} K_{ij} A_{jj}^{(2)} \right),$$

where indexing with the index sets  $\mathbf{i}$  and  $\mathbf{j}$  denotes the extraction of a sub-matrix of the respective matrix.

We can now take the derivatives of  $\hat{\gamma}_{hs}^2$  with respect to the pivot and non-pivot elements (corresponding to the index sets  $\mathbf{i}$  and  $\mathbf{j}$  and—equivalently—to rows of  $J$ ). Note that equation (1.1) becomes  $\frac{\partial f}{\partial \Upsilon_{\cdot\eta}} = \text{diag} \left( \frac{\partial f}{\partial K} D_\eta^\top \right)$  in the case of the cross-kernel matrix  $K_{ij}$ . Using the product rule for matrix derivatives [2], this reduces the derivative of the approximate case to the one above since

$$\begin{aligned} \frac{\partial}{\partial K_{ji}} \text{tr} \left( K_{ij}^\top K_{ii}^{-1} K_{ij} A_{jj}^{(2)} \right) &= K_{ii}^{-1} K_{ij} A_{jj}^{(2)} + \left( A_{jj}^{(2)} K_{ji} K_{ii}^{-1} \right)^\top \\ \frac{\partial}{\partial K_{ii}} \text{tr} \left( K_{ji} K_{ii}^{-1} K_{ij} A_{jj}^{(2)} \right) &= -K_{ii}^{-1} K_{ij} A_{jj}^{(2)} K_{ji} K_{ii}^{-1}. \end{aligned}$$

Let  $K := K_1$ ,  $A^{(2)} := H \tilde{K}_2 K$ , and  $\mathbf{i}$  and  $\mathbf{j}$  the pivot and non-pivot indices of  $K_1$ . Then the first  $k$  columns (corresponding to the features  $\mathbf{u}_i$ ) of  $J$  are given by

$$\begin{aligned} J_{i\eta}^{(u)} &= \frac{2}{(m-1)^2} \left( \text{diag} \left( A_{ii}^{(2)} D_{ii\eta}^{(u)\top} \right) + \text{diag} \left( A_{ij}^{(2)} D_{ij\eta}^{(u)\top} \right) + \text{diag} \left( K_{ii}^{-1} K_{ij} A_{jj}^{(2)} D_{ij\eta}^{(u)\top} \right) - \text{diag} \left( K_{ii}^{-1} K_{ij} A_{jj}^{(2)} K_{ij}^\top K_{ii}^{-1} D_{ii\eta}^{(u)\top} \right) \right) \\ J_{j\eta}^{(u)} &= \frac{2}{(m-1)^2} \left( \text{diag} \left( A_{ji}^{(2)} D_{ji\eta}^{(u)\top} \right) + \text{diag} \left( A_{jj}^{(2)} K_{ij}^\top K_{ii}^{-1} D_{ij\eta}^{(u)\top} \right) \right). \end{aligned}$$

Let  $K := K_2$ ,  $A^{(1)} := H \tilde{K}_1 H$ , and  $\mathbf{i}$  and  $\mathbf{j}$  the pivot and non-pivot indices of  $K_2$ . Then the last  $n - k$  columns (corresponding to the features  $\mathbf{v}_i$ ) of  $J$  are given by

$$\begin{aligned} J_{i\eta}^{(v)} &= \frac{2}{(m-1)^2} \left( \text{diag} \left( A_{ii}^{(1)} D_{ii\eta}^{(v)\top} \right) + \text{diag} \left( A_{ij}^{(1)} D_{ij\eta}^{(v)\top} \right) + \text{diag} \left( K_{ii}^{-1} K_{ij} A_{jj}^{(1)} D_{ij\eta}^{(v)\top} \right) - \text{diag} \left( K_{ii}^{-1} K_{ij} A_{jj}^{(1)} K_{ij}^\top K_{ii}^{-1} D_{ii\eta}^{(v)\top} \right) \right) \\ J_{j\eta}^{(v)} &= \frac{2}{(m-1)^2} \left( \text{diag} \left( A_{ji}^{(1)} D_{ji\eta}^{(v)\top} \right) + \text{diag} \left( A_{jj}^{(1)} K_{ij}^\top K_{ii}^{-1} D_{ij\eta}^{(v)\top} \right) \right). \end{aligned}$$

## References

- [1] F. R. Bach and M. I. Jordan. Predictive low-rank decomposition for kernel methods. In *Proceedings of the 22nd international conference on Machine learning - ICML '05*, pages 33–40, New York, New York, USA, 2005. ACM Press.
- [2] T. P. Minka. Old and New Matrix Algebra Useful for Statistics. *MIT Media Lab Note*, pages 1–19, 2000.
